# Supplementary material for: Hetero-association models of non-covalent molecular complexation
Source: Royal Society of Chemistry journal article supplement (doi:10.1039/c8cp03183e), 2019-01-01
Supplement: c8cp03183e1.pdf [file c8cp03183e1.pdf]

## Supplemental Material for

### “The hetero-association models of non-covalent molecular complexation”

Anatoly S. Buchelnikov, Vladislav P. Evstigneev, Maxim P. Evstigneev

*Department of Physics, Sevastopol State University, Sevastopol, Russia*

The sections (A)–(I) contain sets of equations required to describe practically important types of hetero-associations. The following notations are used below:

|                               |                                                                                                                                                                                                        |
|-------------------------------|--------------------------------------------------------------------------------------------------------------------------------------------------------------------------------------------------------|
| $\Xi$                         | partition function of aggregating molecular system;                                                                                                                                                    |
| $\Xi_{\text{corr}}$           | partition function of aggregating molecular system corrected for the ‘reflected complexes’;                                                                                                            |
| $x_1, y_1, z_1$               | equilibrium monomer concentrations of <b>X</b> , <b>Y</b> or <b>Z</b> components, respectively;                                                                                                        |
| $x_0, y_0, z_0$               | total concentrations of <b>X</b> , <b>Y</b> or <b>Z</b> components, respectively;                                                                                                                      |
| $K_X, K_Y, K_Z$               | equilibrium constants of <b>X</b> – <b>X</b> , <b>Y</b> – <b>Y</b> or <b>Z</b> – <b>Z</b> self-association, respectively;                                                                              |
| $K_h$                         | equilibrium constant of <b>X</b> – <b>Y</b> hetero-association (for two-component <b>X</b> – <b>Y</b> systems (‘1:n’, ‘2:n’ and ‘m:n’) only);                                                          |
| $K_{XY}, K_{XZ}, K_{YZ}$      | equilibrium constants of <b>X</b> – <b>Y</b> , <b>X</b> – <b>Z</b> or <b>Y</b> – <b>Z</b> hetero-association, respectively (for three-component <b>X</b> – <b>Y</b> – <b>Z</b> system (‘1:m:n’) only); |
| $\xi_X$                       | experimental observable of <b>X</b> component;                                                                                                                                                         |
| $\xi_X^{(m)}$                 | experimental observable of <b>X</b> monomer;                                                                                                                                                           |
| $\xi_X^{(d)}$                 | experimental observable of <b>X</b> molecule being in contact with another <b>X</b> molecule (homo-stack);                                                                                             |
| $\xi_X^{(h)}, \xi_{XZ}^{(h)}$ | experimental observables of <b>X</b> molecule being in contact with <b>Y</b> or <b>Z</b> molecule, respectively (hetero-stacks).                                                                       |

The sections (J) and (K) contain MATLAB code designed to fit spectrophotometric titration curves for the cases of 1:n and 1:m:n models of hetero-association, respectively.

## A. ‘1:n’ hetero-association model

Partition function:

$$\Xi^{(1:n)} = x_1 + \frac{y_1}{1 - K_Y y_1} \left( 1 + 2K_h x_1 + \frac{K_h^2 x_1 y_1}{1 - K_Y y_1} \right) \quad (\text{A1})$$

Mass conservation law:

$$\begin{cases} x_0 = x_1 \left( 1 + \frac{K_h y_1}{1 - K_Y y_1} \right)^2 \\ y_0 = \frac{y_1}{(1 - K_Y y_1)^2} \left( 1 + 2K_h x_1 + \frac{K_h^2 x_1 y_1}{1 - K_Y y_1} \right) \end{cases} \quad (\text{A2})$$

Expression for experimental observable:

$$\xi_X^{(1:n)} = \xi_X^{(m)} - 2 \left( \xi_X^{(m)} - \xi_{XY}^{(h)} \right) \frac{K_h x_1 y_1}{1 - K_Y y_1} \left( 1 + \frac{K_h y_1}{1 - K_Y y_1} \right) \frac{1}{x_0} \quad (\text{A3})$$

## B. ‘1:n’ hetero-association model accounting for ‘reflected complexes’

Partition function:

$$\Xi_{\text{corr}}^{(1:n)} = x_1 + \frac{y_1}{1 - K_Y y_1} \left( 1 + K_h x_1 + \frac{K_h^2 x_1 y_1}{1 - K_Y^2 y_1^2} \right) \quad (\text{B1})$$

Mass conservation law:

$$\begin{cases} x_0 = x_1 + \frac{K_h x_1 y_1}{1 - K_Y y_1} \left( 1 + \frac{K_h y_1}{1 - K_Y^2 y_1^2} \right) \\ y_0 = \frac{y_1}{(1 - K_Y y_1)^2} \left( 1 + K_h x_1 \left( 1 + \frac{K_h y_1}{1 - K_Y y_1} + \frac{K_h y_1}{(1 + K_Y y_1)^2} \right) \right) \end{cases} \quad (\text{B2})$$

Expression for experimental observable:

$$\xi_X^{(1:n)} = \xi_X^{(m)} - \left( \xi_X^{(m)} - \xi_{XY}^{(h)} \right) \frac{K_h x_1 y_1}{1 - K_Y y_1} \left( 1 + \frac{2K_h y_1}{1 - K_Y^2 y_1^2} \right) \frac{1}{x_0} \quad (\text{B3})$$

## C. ‘2:n’ hetero-association model

Partition function:

$$\Xi^{(2:n)} = \frac{y_1}{1 - K_Y y_1} + x_1 \left( 1 + K_X x_1 + \frac{K_h^2 x_1 y_1}{1 - K_Y y_1} \right) \left( 1 + \frac{K_h y_1}{1 - K_Y y_1} \right)^2 \quad (\text{C1})$$

Mass conservation law:

$$\begin{cases} x_0 = x_1 \left( 1 + 2K_X x_1 + \frac{2K_h^2 x_1 y_1}{1 - K_Y y_1} \right) \left( 1 + \frac{K_h y_1}{1 - K_Y y_1} \right)^2 \\ y_0 = \frac{y_1}{(1 - K_Y y_1)^2} \left( 1 + K_h x_1 \left( 2 + 2K_X x_1 + K_h x_1 + \frac{3K_h^2 x_1 y_1}{1 - K_Y y_1} \right) \left( 1 + \frac{K_h y_1}{1 - K_Y y_1} \right) \right) \end{cases} \quad (\text{C2})$$

Expression for experimental observable:

$$\xi_X^{(2:n)} = \xi_X^{(m)} - 2 \left( \xi_X^{(m)} - \xi_X^{(d)} \right) K_X x_1^2 \left( 1 + \frac{K_h y_1}{1 - K_Y y_1} \right)^2 \frac{1}{x_0} - 2 \left( \xi_X^{(m)} - \xi_{XY}^{(h)} \right) \frac{K_h x_1 y_1}{1 - K_Y y_1} \left( 1 + \frac{K_h y_1}{1 - K_Y y_1} \right) \left( 1 + K_X x_1 + K_h x_1 + \frac{2K_h^2 x_1 y_1}{1 - K_Y y_1} \right) \frac{1}{x_0} \quad (\text{C3})$$

## D. ‘2:n’ hetero-association model accounting for ‘reflected complexes’

Partition function:

$$\Xi_{\text{corr}}^{(2:n)} = \frac{y_1}{1 - K_Y y_1} + x_1 \left( 1 + K_X x_1 + \frac{K_h^2 x_1 y_1}{1 - K_Y y_1} \right) \left( 1 + \frac{K_h y_1}{1 - K_Y y_1} + \frac{K_h^2 y_1^2}{(1 - K_Y y_1)^2 (1 + K_Y y_1)} \right) \quad (\text{D1})$$

Mass conservation law:

$$\begin{cases} x_0 = x_1 \left( 1 + 2K_X x_1 + \frac{2K_h^2 x_1 y_1}{1 - K_Y y_1} \right) \left( 1 + \frac{K_h y_1}{1 - K_Y y_1} + \frac{K_h^2 y_1^2}{(1 - K_Y y_1)^2 (1 + K_Y y_1)} \right) \\ y_0 = \frac{y_1}{(1 - K_Y y_1)^2} \left( 1 + K_h x_1 \left( 1 + K_X x_1 + \frac{K_h^2 x_1 y_1}{1 - K_Y y_1} \right) \left( 1 + \frac{K_h y_1}{1 - K_Y y_1} + \frac{K_h y_1}{(1 + K_Y y_1)^2} \right) + K_h^2 x_1^2 \left( 1 + \left( 1 + \frac{K_h y_1}{1 - K_Y y_1} \right) \frac{K_h y_1}{1 - K_Y y_1} \right) \right) \end{cases} \quad (\text{D2})$$

Expression for experimental observable:

$$\begin{aligned} \xi_X^{(2:n)} = & \xi_X^{(m)} - 2 \left( \xi_X^{(m)} - \xi_X^{(d)} \right) K_X x_1^2 \left( 1 + \frac{K_h y_1}{1 - K_Y y_1} + \frac{K_h^2 y_1^2}{(1 - K_Y y_1)^2 (1 + K_Y y_1)} \right) \frac{1}{x_0} \\ & - \left( \xi_X^{(m)} - \xi_{XY}^{(h)} \right) \frac{K_h x_1 y_1}{1 - K_Y y_1} \left( \left( 1 + \frac{2K_h y_1}{1 - K_Y y_1} \right) \left( 1 + K_X x_1 + K_h x_1 + \frac{2K_h^2 x_1 y_1}{1 - K_Y y_1} \right) + K_h x_1 \left( 1 - \frac{K_h y_1}{1 - K_Y y_1} \right) \right) \frac{1}{x_0} \end{aligned} \quad (\text{D3})$$

## E. ‘m:n’ hetero-association model

Partition function:

$$\Xi^{(m:n)} = \frac{x_1(1 - K_Y y_1 + K_h y_1) + y_1(1 - K_X x_1 + K_h x_1)}{(1 - K_X x_1)(1 - K_Y y_1) - K_h^2 x_1 y_1} \quad (\text{E1})$$

Mass conservation law:

$$\begin{cases} x_0 = x_1 \left( \frac{1 - K_Y y_1 + K_h y_1}{(1 - K_X x_1)(1 - K_Y y_1) - K_h^2 x_1 y_1} \right)^2 \\ y_0 = y_1 \left( \frac{1 - K_X x_1 + K_h x_1}{(1 - K_X x_1)(1 - K_Y y_1) - K_h^2 x_1 y_1} \right)^2 \end{cases} \quad (\text{E2})$$

Expression for experimental observable:

$$\xi_X^{(m:n)} = \xi_X^{(m)} - 2 \left( \xi_X^{(m)} - \xi_X^{(d)} \right) K_X x_1 - \left( \xi_X^{(m)} - \xi_{XY}^{(h)} \right) K_h y_1 \frac{1 - K_X x_1 + K_h x_1}{1 - K_Y y_1 + K_h y_1} \quad (\text{E3})$$

## F. ‘ $m:n$ ’ hetero-association model accounting for ‘reflected complexes’

Partition function:

$$\Xi_{\text{corr}}^{(m:n)} = \frac{1}{2} \left( \frac{x_1(1 - K_Y y_1 + K_h y_1) + y_1(1 - K_X x_1 + K_h x_1)}{(1 - K_X x_1)(1 - K_Y y_1) - K_h^2 x_1 y_1} + \frac{x_1(1 + K_X x_1)(1 - K_Y^2 y_1^2 + K_h^2 y_1^2) + y_1(1 + K_Y y_1)(1 - K_X^2 x_1^2 + K_h^2 x_1^2)}{(1 - K_X^2 x_1^2)(1 - K_Y^2 y_1^2) - K_h^4 x_1^2 y_1^2} \right) \quad (\text{F1})$$

Mass conservation law:

$$\left\{ \begin{array}{l} x_0 = \frac{x_1}{2} \left( \left( \frac{1 - K_Y y_1 + K_h y_1}{(1 - K_X x_1)(1 - K_Y y_1) - K_h^2 x_1 y_1} \right)^2 + \frac{1 + K_X x_1}{1 - K_X x_1} \frac{1 - K_Y^2 y_1^2 + K_h^2 y_1^2}{(1 - K_X^2 x_1^2)(1 - K_Y^2 y_1^2) - K_h^4 x_1^2 y_1^2} \right) \\ \quad + x_1 \frac{K_h^2 x_1 y_1 (1 - K_Y^2 y_1^2 + K_h^2 y_1^2)}{((1 - K_X^2 x_1^2)(1 - K_Y^2 y_1^2) - K_h^4 x_1^2 y_1^2)^2} \left( 1 + K_Y y_1 + \frac{K_h^2 x_1 y_1}{1 - K_X x_1} \right) \\ y_0 = \frac{y_1}{2} \left( \left( \frac{1 - K_X x_1 + K_h x_1}{(1 - K_X x_1)(1 - K_Y y_1) - K_h^2 x_1 y_1} \right)^2 + \frac{1 + K_Y y_1}{1 - K_Y y_1} \frac{1 - K_X^2 x_1^2 + K_h^2 x_1^2}{(1 - K_X^2 x_1^2)(1 - K_Y^2 y_1^2) - K_h^4 x_1^2 y_1^2} \right) \\ \quad + y_1 \frac{K_h^2 x_1 y_1 (1 - K_X^2 x_1^2 + K_h^2 x_1^2)}{((1 - K_X^2 x_1^2)(1 - K_Y^2 y_1^2) - K_h^4 x_1^2 y_1^2)^2} \left( 1 + K_X x_1 + \frac{K_h^2 x_1 y_1}{1 - K_Y y_1} \right) \end{array} \right. \quad (\text{F2})$$

Expression for experimental observable:

$$\begin{aligned} \xi_X^{(m:n)} = & \xi_X^{(m)} - \left( \xi_X^{(m)} - \xi_X^{(d)} \right) K_X x_1^2 \left( \left( \frac{1 - K_Y y_1 + K_h y_1}{(1 - K_X x_1)(1 - K_Y y_1) - K_h^2 x_1 y_1} \right)^2 + \frac{1 - K_Y^2 y_1^2 + K_h^2 y_1^2}{(1 - K_X^2 x_1^2)(1 - K_Y^2 y_1^2) - K_h^4 x_1^2 y_1^2} \right) \frac{1}{x_0} \\ & + 2K_X x_1 \frac{K_h^2 x_1 y_1 (1 - K_Y^2 y_1^2 + K_h^2 y_1^2)}{((1 - K_X^2 x_1^2)(1 - K_Y^2 y_1^2) - K_h^4 x_1^2 y_1^2)^2} \left( 1 + K_Y y_1 + \frac{K_h^2 x_1 y_1}{1 - K_X x_1} \right) \\ & - \left( \xi_X^{(m)} - \xi_{XY}^{(h)} \right) K_h x_1 y_1 \left( \frac{(1 - K_X x_1 + K_h x_1)(1 - K_Y y_1 + K_h y_1)}{((1 - K_X x_1)(1 - K_Y y_1) - K_h^2 x_1 y_1)^2} \right. \\ & \quad + \frac{K_h x_1 (1 + K_Y y_1) ((1 - K_X^2 x_1^2)(1 - K_Y^2 y_1^2 + 2K_h^2 y_1^2) + K_h^4 x_1^2 y_1^2)}{((1 - K_X^2 x_1^2)(1 - K_Y^2 y_1^2) - K_h^4 x_1^2 y_1^2)^2} \\ & \quad \left. + \frac{K_h y_1 (1 + K_X x_1) ((1 - K_Y^2 y_1^2)(1 - K_X^2 x_1^2 + 2K_h^2 x_1^2) + K_h^4 x_1^2 y_1^2)}{((1 - K_X^2 x_1^2)(1 - K_Y^2 y_1^2) - K_h^4 x_1^2 y_1^2)^2} \right) \frac{1}{x_0} \end{aligned} \quad (\text{F3})$$

## G. ‘ $m:n$ ’ hetero-association model with restriction to the number of hetero-interfaces

Partition function:

$$\Xi^{(m:n)} = \frac{x_1}{1 - K_X x_1} + \frac{y_1}{1 - K_Y y_1} + \frac{K_h x_1 y_1}{(1 - K_X x_1)(1 - K_Y y_1)} \left( 1 + \frac{1}{2} \frac{K_h x_1}{1 - K_X x_1} + \frac{1}{2} \frac{K_h y_1}{1 - K_Y y_1} \right) \quad (\text{G1})$$

Mass conservation law:

$$\begin{cases} x_0 = \frac{x_1}{(1 - K_X x_1)^2} \left( 1 + \frac{K_h y_1}{1 - K_Y y_1} + \frac{1}{2} \frac{K_h^2 y_1^2}{(1 - K_Y y_1)^2} + \frac{K_h^2 x_1 y_1}{(1 - K_X x_1)(1 - K_Y y_1)} \right) \\ y_0 = \frac{y_1}{(1 - K_Y y_1)^2} \left( 1 + \frac{K_h x_1}{1 - K_X x_1} + \frac{1}{2} \frac{K_h^2 x_1^2}{(1 - K_X x_1)^2} + \frac{K_h^2 x_1 y_1}{(1 - K_X x_1)(1 - K_Y y_1)} \right) \end{cases} \quad (\text{G2})$$

Expression for experimental observable:

$$\xi_X^{(m:n)} = \frac{x_1}{x_0} \left( \xi_X^{(m)} \left( 2(1 + K_X x_1) - \frac{1}{(1 - K_X x_1)^2} \right) + 2\xi_X^{(d)} \left( \frac{1}{(1 - K_X x_1)^2} - 1 - K_X x_1 \right) + \xi_{XY}^{(h)} \frac{K_h y_1}{(1 - K_X x_1)^2 (1 - K_Y y_1)} \left( 1 + \frac{K_h y_1}{2(1 - K_Y y_1)} + \frac{K_h x_1}{1 - K_X x_1} \right) \right) \quad (\text{G3})$$

$$\xi_X^{(m:n)} = \xi_X^{(m)} - 2 \left( \xi_X^{(m)} - \xi_X^{(d)} \right) K_X x_1 - \left( \xi_X^{(m)} - \xi_{XY}^{(h)} \right) \frac{K_h x_1 y_1}{(1 - K_X x_1)(1 - K_Y y_1)} \left( 1 + \frac{K_h x_1}{1 - K_X x_1} + \frac{K_h y_1}{1 - K_Y y_1} \right) \frac{1}{x_0} \quad (\text{G4})$$

## H. ‘ $1:m:n$ ’ hetero-association model

Partition function:

$$\Xi^{(1:m:n)} = x_1 \left( \frac{K_{XY} y_1 (1 - K_Z z_1 + K_{YZ} z_1) + K_{XZ} z_1 (1 - K_Y y_1 + K_{YZ} y_1)}{(1 - K_Y y_1)(1 - K_Z z_1) - K_{YZ}^2 y_1 z_1} + 1 \right)^2 + \frac{y_1 (1 - K_Z z_1 + K_{YZ} z_1) + z_1 (1 - K_Y y_1 + K_{YZ} y_1)}{(1 - K_Y y_1)(1 - K_Z z_1) - K_{YZ}^2 y_1 z_1} \quad (\text{H1})$$

Mass conservation law:

$$\begin{cases} x_0 = x_1 \left( \frac{K_{XY} y_1 (1 - K_Z z_1 + K_{YZ} z_1) + K_{XZ} z_1 (1 - K_Y y_1 + K_{YZ} y_1)}{(1 - K_Y y_1)(1 - K_Z z_1) - K_{YZ}^2 y_1 z_1} + 1 \right)^2 \\ y_0 = y_1 \left( 2x_1 \frac{K_{XY} (1 - K_Z z_1) + K_{XZ} K_{YZ} z_1}{1 - K_Z z_1 + K_{YZ} z_1} \left( \frac{K_{XY} y_1 (1 - K_Z z_1 + K_{YZ} z_1) + K_{XZ} z_1 (1 - K_Y y_1 + K_{YZ} y_1)}{(1 - K_Y y_1)(1 - K_Z z_1) - K_{YZ}^2 y_1 z_1} + 1 \right) + 1 \right) \left( \frac{1 - K_Z z_1 + K_{YZ} z_1}{(1 - K_Y y_1)(1 - K_Z z_1) - K_{YZ}^2 y_1 z_1} \right)^2 \\ z_0 = z_1 \left( 2x_1 \frac{K_{XZ} (1 - K_Y y_1) + K_{XY} K_{YZ} y_1}{1 - K_Y y_1 + K_{YZ} y_1} \left( \frac{K_{XY} y_1 (1 - K_Z z_1 + K_{YZ} z_1) + K_{XZ} z_1 (1 - K_Y y_1 + K_{YZ} y_1)}{(1 - K_Y y_1)(1 - K_Z z_1) - K_{YZ}^2 y_1 z_1} + 1 \right) + 1 \right) \left( \frac{1 - K_Y y_1 + K_{YZ} y_1}{(1 - K_Y y_1)(1 - K_Z z_1) - K_{YZ}^2 y_1 z_1} \right)^2 \end{cases} \quad (\text{H2})$$

Expression for experimental observable:

$$\begin{aligned} \xi_X^{(1:m:n)} = & \xi_X^{(m)} - 2 \left( \xi_X^{(m)} - \xi_{XY}^{(h)} \right) \left( \frac{K_{XY} y_1 (1 - K_Z z_1 + K_{YZ} z_1) + K_{XZ} z_1 (1 - K_Y y_1 + K_{YZ} y_1)}{(1 - K_Y y_1)(1 - K_Z z_1) - K_{YZ}^2 y_1 z_1} + 1 \right) \frac{K_{XY} x_1 y_1 (1 - K_Z z_1 + K_{YZ} z_1)}{(1 - K_Y y_1)(1 - K_Z z_1) - K_{YZ}^2 y_1 z_1} \frac{1}{x_0} \\ & - 2 \left( \xi_X^{(m)} - \xi_{XZ}^{(h)} \right) \left( \frac{K_{XY} y_1 (1 - K_Z z_1 + K_{YZ} z_1) + K_{XZ} z_1 (1 - K_Y y_1 + K_{YZ} y_1)}{(1 - K_Y y_1)(1 - K_Z z_1) - K_{YZ}^2 y_1 z_1} + 1 \right) \frac{K_{XZ} x_1 z_1 (1 - K_Y y_1 + K_{YZ} y_1)}{(1 - K_Y y_1)(1 - K_Z z_1) - K_{YZ}^2 y_1 z_1} \frac{1}{x_0} \end{aligned} \quad (\text{H3})$$

# I. ‘1:m:n’ hetero-association model accounting for ‘reflected complexes’

Partition function:

$$\Xi_{\text{corr}}^{(1:m:n)} = \frac{1}{2} \left( x_1 + x_1 \left( \frac{K_{XY}y_1(1 - K_Zz_1 + K_{YZ}z_1) + K_{XZ}z_1(1 - K_Yy_1 + K_{YZ}y_1)}{(1 - K_Yy_1)(1 - K_Zz_1) - K_{YZ}^2y_1z_1} + 1 \right)^2 + \frac{y_1(1 - K_Zz_1 + K_{YZ}z_1) + z_1(1 - K_Yy_1 + K_{YZ}y_1)}{(1 - K_Yy_1)(1 - K_Zz_1) - K_{YZ}^2y_1z_1} \right. \\ \left. + \frac{y_1(1 + K_Yy_1 + K_{XY}^2x_1y_1)(1 - K_Z^2z_1^2 + K_{YZ}^2z_1^2) + z_1(1 + K_Zz_1 + K_{XZ}^2x_1z_1)(1 - K_Y^2y_1^2 + K_{YZ}^2y_1^2)}{(1 - K_Y^2y_1^2)(1 - K_Z^2z_1^2) - K_{YZ}^4y_1^2z_1^2} \right) \quad (11)$$

Mass conservation law:

$$\left\{ \begin{array}{l} x_0 = \frac{x_1}{2} \left( \left( \frac{K_{XY}y_1(1 - K_Zz_1 + K_{YZ}z_1) + K_{XZ}z_1(1 - K_Yy_1 + K_{YZ}y_1)}{(1 - K_Yy_1)(1 - K_Zz_1) - K_{YZ}^2y_1z_1} + 1 \right)^2 + \frac{K_{XY}^2y_1^2(1 - K_Z^2z_1^2 + K_{YZ}^2z_1^2) + K_{XZ}^2z_1^2(1 - K_Y^2y_1^2 + K_{YZ}^2y_1^2)}{(1 - K_Y^2y_1^2)(1 - K_Z^2z_1^2) - K_{YZ}^4y_1^2z_1^2} + 1 \right) \\ y_0 = \frac{y_1}{2} \left( \frac{2(K_{XY}y_1(1 - K_Zz_1 + K_{YZ}z_1) + K_{XZ}z_1(1 - K_Yy_1 + K_{YZ}y_1))(K_{XY}x_1(1 - K_Zz_1) + K_{XZ}K_{YZ}x_1z_1)(1 - K_Zz_1 + K_{YZ}z_1)}{((1 - K_Yy_1)(1 - K_Zz_1) - K_{YZ}^2y_1z_1)^3} \right. \\ \left. + \frac{((1 + 2K_{XY}x_1)(1 - K_Zz_1) + K_{YZ}z_1(1 + 2K_{XZ}x_1))(1 - K_Zz_1 + K_{YZ}z_1)}{((1 - K_Yy_1)(1 - K_Zz_1) - K_{YZ}^2y_1z_1)^2} + \frac{1 + K_Yy_1}{1 - K_Yy_1} \frac{1 - K_Z^2z_1^2 + K_{YZ}^2z_1^2}{(1 - K_Y^2y_1^2)(1 - K_Z^2z_1^2) - K_{YZ}^4y_1^2z_1^2} \right) \\ + \frac{y_1^2(1 - K_Z^2z_1^2 + K_{YZ}^2z_1^2)}{((1 - K_Y^2y_1^2)(1 - K_Z^2z_1^2) - K_{YZ}^4y_1^2z_1^2)^2} \left( K_{XY}^2x_1(1 - K_Z^2z_1^2) + K_{XZ}^2K_{YZ}^2x_1z_1^2 + K_{YZ}^2z_1(1 + K_Zz_1) + \frac{K_{YZ}^4y_1z_1^2}{1 - K_Yy_1} \right) \\ z_0 = \frac{z_1}{2} \left( \frac{2(K_{XY}y_1(1 - K_Zz_1 + K_{YZ}z_1) + K_{XZ}z_1(1 - K_Yy_1 + K_{YZ}y_1))(K_{XZ}x_1(1 - K_Yy_1) + K_{XY}K_{YZ}x_1y_1)(1 - K_Yy_1 + K_{YZ}y_1)}{((1 - K_Yy_1)(1 - K_Zz_1) - K_{YZ}^2y_1z_1)^3} \right. \\ \left. + \frac{((1 + 2K_{XZ}x_1)(1 - K_Yy_1) + K_{YZ}y_1(1 + 2K_{XY}x_1))(1 - K_Yy_1 + K_{YZ}y_1)}{((1 - K_Yy_1)(1 - K_Zz_1) - K_{YZ}^2y_1z_1)^2} + \frac{1 + K_Zz_1}{1 - K_Zz_1} \frac{1 - K_Y^2y_1^2 + K_{YZ}^2y_1^2}{(1 - K_Y^2y_1^2)(1 - K_Z^2z_1^2) - K_{YZ}^4y_1^2z_1^2} \right) \\ + \frac{z_1^2(1 - K_Y^2y_1^2 + K_{YZ}^2y_1^2)}{((1 - K_Y^2y_1^2)(1 - K_Z^2z_1^2) - K_{YZ}^4y_1^2z_1^2)^2} \left( K_{XZ}^2x_1(1 - K_Y^2y_1^2) + K_{XY}^2K_{YZ}^2x_1y_1^2 + K_{YZ}^2y_1(1 + K_Yy_1) + \frac{K_{YZ}^4y_1^2z_1}{1 - K_Zz_1} \right) \end{array} \right. \quad (12)$$

Expression for experimental observable:

$$\xi_X^{(1:m:n)} = \xi_X^{(m)} - \left( \xi_X^{(m)} - \xi_{XY}^{(h)} \right) K_{XY}x_1y_1 \left( \left( \frac{K_{XY}y_1(1 - K_Zz_1 + K_{YZ}z_1) + K_{XZ}z_1(1 - K_Yy_1 + K_{YZ}y_1)}{(1 - K_Yy_1)(1 - K_Zz_1) - K_{YZ}^2y_1z_1} + 1 \right) \frac{1 - K_Zz_1 + K_{YZ}z_1}{(1 - K_Yy_1)(1 - K_Zz_1) - K_{YZ}^2y_1z_1} \right) \frac{1}{x_0} \\ - \left( \xi_X^{(m)} - \xi_{XZ}^{(h)} \right) K_{XZ}x_1z_1 \left( \left( \frac{K_{XY}y_1(1 - K_Zz_1 + K_{YZ}z_1) + K_{XZ}z_1(1 - K_Yy_1 + K_{YZ}y_1)}{(1 - K_Yy_1)(1 - K_Zz_1) - K_{YZ}^2y_1z_1} + 1 \right) \frac{1 - K_Yy_1 + K_{YZ}y_1}{(1 - K_Yy_1)(1 - K_Zz_1) - K_{YZ}^2y_1z_1} \right) \frac{1}{x_0} \quad (13)$$

## J. MATLAB code for the case of '1:n' model of hetero-association

The code was designed to fit spectrophotometric titration curves for the case of '1:n' model of hetero-association and was tested by means of MATLAB software (version 9.2, MathWorks Inc.).

---

```
function [p, ps] = het_1n
str = uigetfile('*.dat','File Selector');
DE = load(str); X0 = 0.0126; Em = DE(size(DE,1),2)/X0;
switch str
    case 'pf-caf.dat'
        Ky = 0.012; Kh0 = 0.14; Eh0 = 22;
    case 'pf-nmd.dat'
        Ky = 0.001; Kh0 = 0.03; Eh0 = 25;
end
[p,d] = lsqcurvefit(@(x,xdata) obsparam(x,xdata,Ky,X0,Em), [Kh0;Eh0], DE(:,1), DE(:,2));
c = 0:0.1:DE(1,1); r = obsparam(p,c,Ky,X0,Em);
plot(DE(:,1),DE(:,2),'.r',c,r,'b');
p = [p; 1-d/sum((DE(:,2)-mean(DE(:,2))).^2)]; ps = [c.' r];

function F = obsparam(x,xdata,Ky,X0,Em)
Kh = x(1); Eh = x(2); c = zeros(length(xdata),2);
for i = 1:length(xdata)
    c(i,:) = fsolve(@(c)mcl(c,xdata(i),Kh,Ky,X0), [0.01 0.01], optimset('Display','off'));
end
X = c(:,1); Y = c(:,2);
Txy = Kh*X.*Y./(1-Ky*Y).*(1+2*Kh*Y./(1-Ky^2*Y.^2));
F = Em*X0-(Em-Eh)*Txy;

function y = mcl(c,Yi,Kh,Ky,X0)
X = c(1); Y = c(2);
y(1) = X*(1+Kh*Y/(1-Ky*Y)+Kh^2*Y^2/(1-Ky*Y)^2/(1+Ky*Y))-X0;
y(2) = Y/(1-Ky*Y)^2*(1+Kh*X+Kh^2*X*Y/(1-Ky*Y)+Kh^2*X*Y/(1+Ky*Y)^2)-Yi;
```

---

pf-caf.dat contains the following data

| CAF concentration, mM | Absorbance, a.u. |
|-----------------------|------------------|
| 60.000000             | 0.335884         |
| 42.000000             | 0.341133         |
| 29.400000             | 0.348753         |
| 20.580000             | 0.356714         |
| 14.406000             | 0.365886         |
| 10.084000             | 0.376255         |
| 8.0673600             | 0.382377         |
| 6.0505200             | 0.390826         |
| 3.9328380             | 0.402018         |
| 1.9664190             | 0.416763         |
| 0.9832095             | 0.425175         |
| 0.7865676             | 0.427154         |
| 0.5505973             | 0.429362         |
| 0.0000000             | 0.437506         |

pf-nmd.dat contains the following data

| NMD concentration, mM | Absorbance, a.u. |
|-----------------------|------------------|
| 80.000000             | 0.418656         |
| 60.000000             | 0.419901         |
| 42.000000             | 0.423586         |
| 29.400000             | 0.426195         |
| 20.580000             | 0.428955         |
| 14.406000             | 0.430713         |
| 10.084000             | 0.432000         |
| 8.0673600             | 0.432814         |
| 6.0505200             | 0.433334         |
| 3.9328380             | 0.434392         |
| 1.9664190             | 0.435408         |
| 0.9832095             | 0.435953         |
| 0.7865676             | 0.435865         |
| 0.5505973             | 0.435900         |
| 0.0000000             | 0.436921         |



## K. MATLAB code for the case of '1:m:n' model of hetero-association

The code was designed to fit spectrophotometric titration curves for the case of '1:m:n' model of hetero-association and was tested by means of MATLAB software (version 9.2, MathWorks Inc.).

---

```
function [p, ps] = het_1mn
DE = load('pf-nmd-caf.dat');
X0 = 0.0126; Em = DE(size(DE,1),2)/X0; Y0 = 10; Ky = 0.001; Kz = 0.012;
K0 = 0.007; Khy = 0.0316; Khz = 0.1399; Ehy = 33.7101; Ehz = 30.2462;
[p,d] = lsqcurvefit(@(x,xdata) obsparam(x,xdata,Ky,Kz,X0,Y0,Em,Ehy,Ehz), [K0;Khy;Khz;Ehy;Ehz], DE(:,1), DE(:,2));
c = 0:0.1:DE(1,1); r = obsparam(p,c,Ky,Kz,X0,Y0,Em,Ehy,Ehz);
plot(DE(:,1),DE(:,2), 'r', c, r, 'b');
p = [p; 1-d/sum((DE(:,2)-mean(DE(:,2))).^2)]; ps = [c.' r];

function F = obsparam(x,xdata,Ky,Kz,X0,Y0,Em,Ehy,Ehz)
K0 = x(1); Khy = x(2); Khz = x(3); %Ehy = x(4); Ehz = x(5);
c = zeros(length(xdata),3);
for i = 1:length(xdata)
    c(i,:) = fsolve(@(c) mcl(c,xdata(i),K0,Ky,Kz,X0,Y0,Khy,Khz), [0.01 0.01 xdata(i)], optimset('Display','off'));
end
X = c(:,1); Y = c(:,2); Z = c(:,3);
B = Y./(1-Ky.*Y); Bs = Y.^2./(1-Ky.^2.*Y.^2);
C = Z./(1-Kz.*Z); Cs = Z.^2./(1-Kz.^2.*Z.^2);
Txy = Khy*X.*(((Khy*B.*(1+K0*C)+Khz*C.*(1+K0*B))./(1-K0.^2*B.*C)+1).*...
    B.*(1+K0*C)./(1-K0.^2*B.*C)+Khy*Bs.*(1+K0.^2*Cs)./(1-K0.^4*Bs.*Cs));
Txz = Khz*X.*(((Khy*B.*(1+K0*C)+Khz*C.*(1+K0*B))./(1-K0.^2*B.*C)+1).*...
    C.*(1+K0*B)./(1-K0.^2*B.*C)+Khz*Cs.*(1+K0.^2*Bs)./(1-K0.^4*Bs.*Cs));
F = Em*X0-(Em-Ehy)*Txy-(Em-Ehz)*Txz;

function y = mcl(c,Zi,K0,Ky,Kz,X0,Y0,Khy,Khz)
X = c(1); Y = c(2); Z = c(3);
B = Y/(1-Ky*Y); Bs = Y^2/(1-Ky.^2*Y^2);
C = Z/(1-Kz*Z); Cs = Z^2/(1-Kz.^2*Z^2);
y(1) = X/2*(((Khy*B*(1+K0*C)+Khz*C*(1+K0*B))/(1-K0.^2*B*C)+1)^2+...
    (Khy.^2*Bs*(1+K0.^2*Cs)+Khz.^2*Cs*(1+K0.^2*Bs))/(1-K0.^4*Bs*Cs)+1)-X0;
y(2) = Y/(1-Ky*Y)^2/2*(2*X*(Khy*B*(1+K0*C)+Khz*C*(1+K0*B))*(Khy+Khz*K0*C)*(1+K0*C)/(1-K0.^2*B*C)^3+...
    (1+K0*C+2*X*(Khy+Khz*K0*C))*(1+K0*C)/(1-K0.^2*B*C)^2+(1+K0.^2*Cs)/(1-K0.^4*Bs*Cs)+(Y/(1-Ky.^2*Y^2))^2*...
    (X*(Khy.^2+Khz.^2*K0.^2*Cs)+K0.^2*(C+K0.^2*B*Cs))*(1+K0.^2*Cs)/(1-K0.^4*Bs*Cs)^2-Y0;
y(3) = Z/(1-Kz*Z)^2/2*(2*X*(Khy*B*(1+K0*C)+Khz*C*(1+K0*B))*(Khz+Khy*K0*B)*(1+K0*B)/(1-K0.^2*B*C)^3+...
    (1+K0*B+2*X*(Khz+Khy*K0*B))*(1+K0*B)/(1-K0.^2*B*C)^2+(1+K0.^2*Bs)/(1-K0.^4*Bs*Cs)+(Z/(1-Kz.^2*Z^2))^2*...
    (X*(Khz.^2+Khy.^2*K0.^2*Bs)+K0.^2*(B+K0.^2*Bs*C))*(1+K0.^2*Bs)/(1-K0.^4*Bs*Cs)^2-Zi;
```

---

pf-nmd-caf.dat contains the following data

---

| CAF concentration, mM | Absorbance, a.u. |
|-----------------------|------------------|
| 30.000000             | 0.353788         |
| 21.000000             | 0.360417         |
| 14.700000             | 0.368995         |
| 10.290000             | 0.378697         |
| 7.2030000             | 0.388950         |
| 5.0421000             | 0.398328         |
| 4.0336800             | 0.404413         |
| 3.0252600             | 0.411276         |
| 1.9664190             | 0.418559         |
| 0.9832095             | 0.428156         |
| 0.4916048             | 0.432835         |
| 0.3932838             | 0.433544         |
| 0.2752987             | 0.435273         |
| 0.0000000             | 0.437428         |

---
